# Supplementary material for: TNF-α-induced alterations in stromal progenitors enhance leukemic stem cell growth via CXCR2 signaling
Source: PubMed Central journal article supplement — Cell Rep. Author manuscript; Available in PMC 2021 Jul 20. (PMC8292106; doi:10.1016/j.celrep.2021.109386), 2021-07-13
Supplement: NIHMS1724277-supplement-1.pdf [file NIHMS1724277-supplement-1.pdf]

**Supplemental information**

**TNF- $\alpha$ -induced alterations in stromal  
progenitors enhance leukemic stem cell  
growth via CXCR2 signaling**

**Puneet Agarwal, Hui Li, Kwangmin Choi, Kathleen Hueneman, Jianbo He, Robert S. Welner, Daniel T. Starczynowski, and Ravi Bhatia**

## Supplementary Figures and Tables

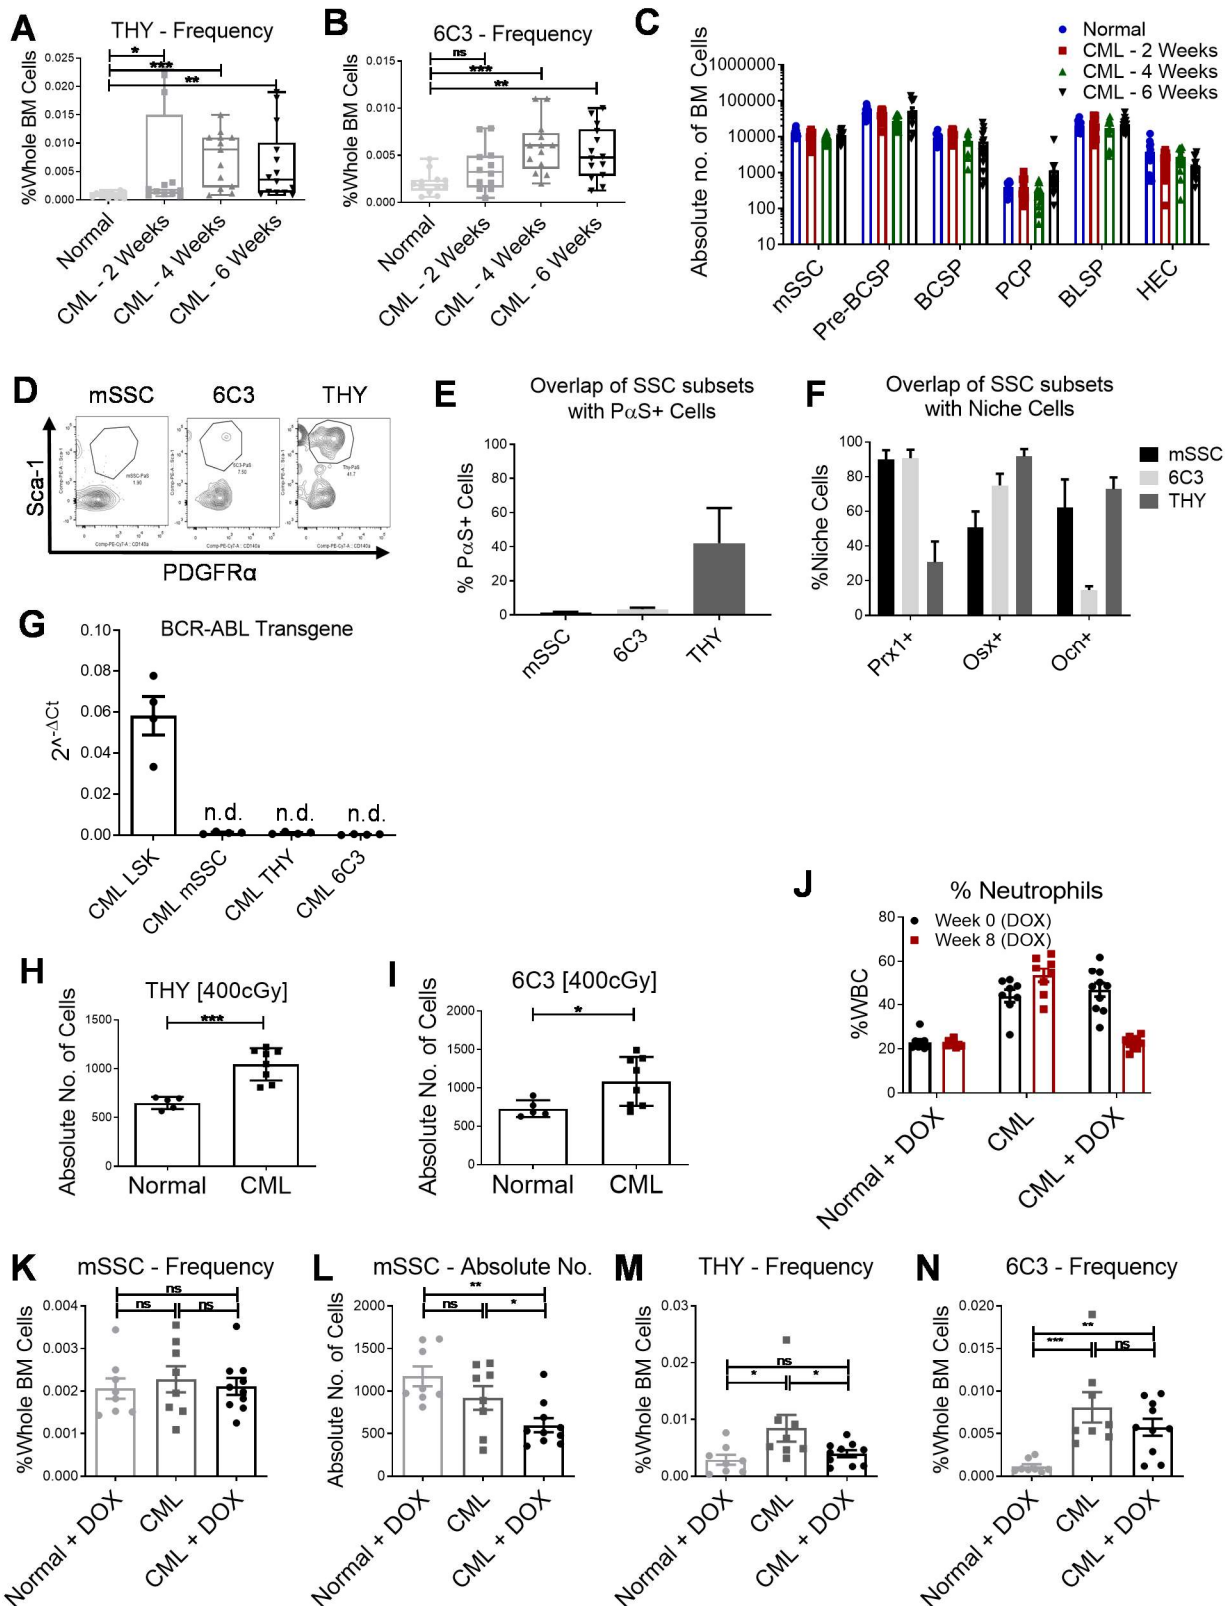

**Figure S1. Increased stroma-forming and bone-forming progenitors in CML bone marrow (Related to Figure 1)**

Frequency of THY+ (A) and 6C3+ cells (B), and the absolute number of subsets other than THY and 6C3 cells (C) within total bone marrow cells per four bones (2 femurs+2 tibias) are shown. Representative flow cytometry gating strategy (D) and the pooled data (n=4) for the overlap of indicated BM subsets with PDGFR $\alpha$ +Sca-1+ (PaS+) cells (E). Frequency of BM subsets expressing tdTomato in various Cre+ transgenic lines (n=3 mice) (F). Expression of the Bcr-Abl transgene in FACS sorted hematopoietic stem/progenitors (LSK, CD45+Lin-Sca-1+c-Kit+) and various BM mesenchymal subsets (n=4 mice/group); n.d. not determined (G). Absolute number of THY+ (H) and 6C3+ cells (I) from recipient mice irradiated at 400cGy from the experiment in Figure 1E. (J) Percentage of neutrophils in the PB of primary CML and aged-matched WT normal mice either re-exposed to doxycycline or not. Frequency (K) and absolute number of mSSC (L), THY+ (M), and 6C3+ cells (N) within the BM of indicated groups. Error bars represent mean  $\pm$  sem. Significance values. \*P< 0.05, \*\*P< 0.01, \*\*\*P<0.001, \*\*\*\*P<0.0001.

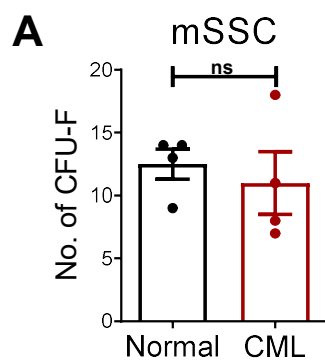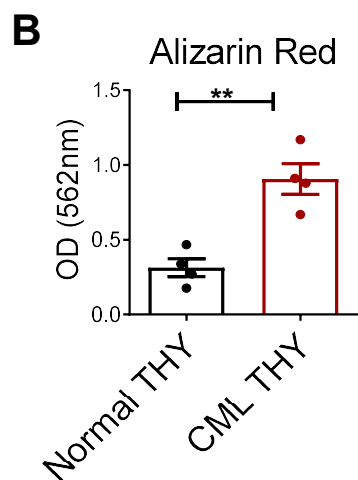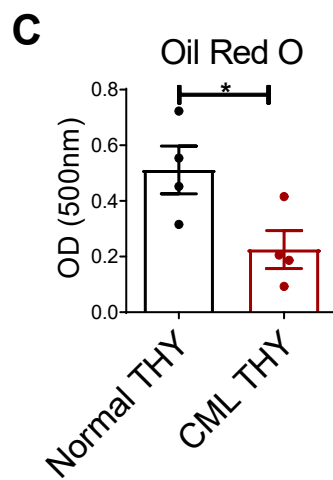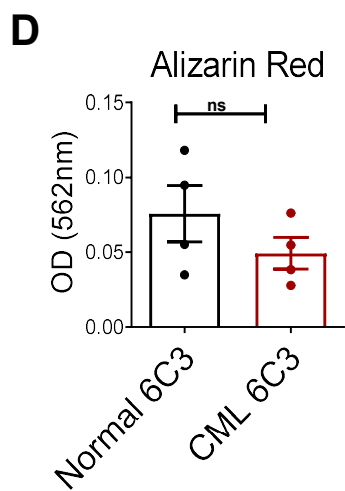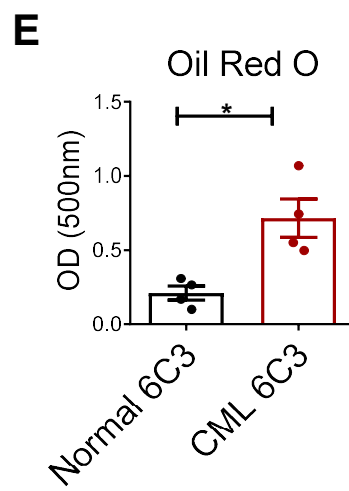

**Figure S2. Altered cycling and differentiation of CML 6C3+ and THY+ progenitors**  
**(Related to Figure 2)**

CFU-F colonies generated from normal and CML BM mSSC cells (A) (n=4 replicates/group). Quantification of osteoblast (B) and adipocyte (C) differentiation of normal and CML THY+ cells, and osteoblast (D) and adipocyte (E) differentiation of normal and CML 6C3+ cells (n=4 independent experiments). Error bars represent mean  $\pm$  sem. Significance values. \*P< 0.05, \*\*P< 0.01, \*\*\*P<0.001, \*\*\*\*P<0.0001.

**A**

| GENESETS POSITIVELY ENRICHED IN 6C3 CELLS        |      |         |             |             |
|--------------------------------------------------|------|---------|-------------|-------------|
| NAME                                             | SIZE | NES     | NOM p-val   | FDR q-val   |
| <b>ADIPOGENESIS RELATED</b>                      |      |         |             |             |
| BURTON_ADIPOGENESIS_8                            | 76   | 3.87641 | 0           | 0           |
| NAKAMURA_ADIPOGENESIS_EARLY_UP                   | 47   | 2.09626 | 0           | 0.012447664 |
| VERNOCHET_ADIPOGENESIS                           | 18   | 1.84086 | 0.005859375 | 0.0401621   |
| <b>ECM RELATED</b>                               |      |         |             |             |
| NABA_CORE_MATRISOME                              | 205  | 6.58709 | 0           | 0           |
| NABA_MATRISOME_ASSOCIATED                        | 440  | 6.5002  | 0           | 0           |
| NABA_ECM_GLYCOPROTEINS                           | 142  | 5.55783 | 0           | 0           |
| NABA_ECM_REGULATORS                              | 142  | 4.25922 | 0           | 0           |
| REACTOME_EXTRACELLULAR_MATRIX_ORGANIZATION       | 70   | 4.08028 | 0           | 0           |
| KEGG_ECM_RECEPTOR_INTERACTION                    | 79   | 3.3602  | 0           | 0           |
| <b>GENESETS NEGATIVELY ENRICHED IN THY CELLS</b> |      |         |             |             |
| <b>ADIPOGENESIS RELATED</b>                      |      |         |             |             |
| BURTON_ADIPOGENESIS_1                            | 29   | -2.2995 | 0           | 0.003625277 |
| NAKAMURA_ADIPOGENESIS_LATE_UP                    | 83   | -2.152  | 0.004065041 | 0.008029568 |
| STEGER_ADIPOGENESIS_UP                           | 17   | -2.1239 | 0.004282655 | 0.009231052 |
| URS_ADIPOCYTE_DIFFERENTIATION_UP                 | 59   | -1.9031 | 0.006224067 | 0.025960509 |
| <b>ECM RELATED</b>                               |      |         |             |             |
| NABA_ECM_GLYCOPROTEINS                           | 118  | -4.2171 | 0           | 0           |
| KEGG_ECM_RECEPTOR_INTERACTION                    | 73   | -3.2571 | 0           | 0           |
| NABA_ECM_REGULATORS                              | 117  | -2.3451 | 0           | 0.002851269 |
| BIOCARTA_ECM_PATHWAY                             | 24   | -1.8122 | 0.01980198  | 0.03808136  |

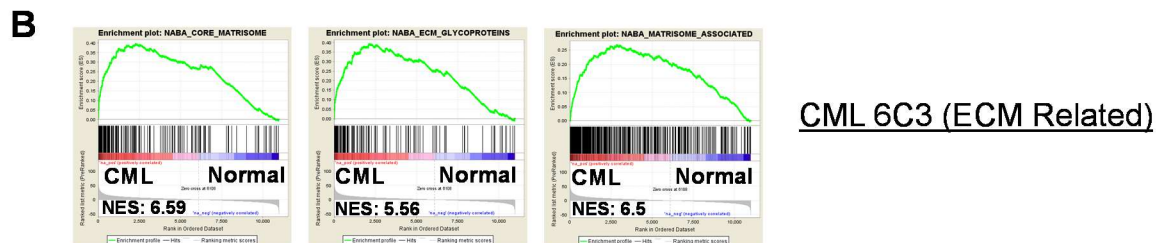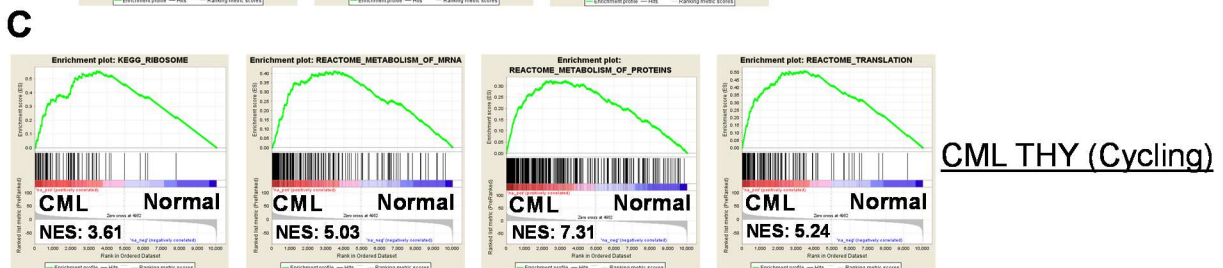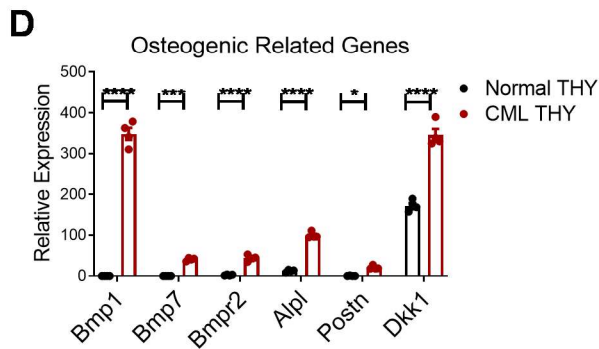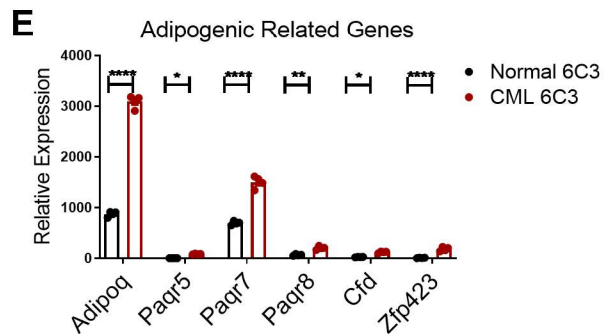

**Figure S3. CML 6C3+ stromal progenitors demonstrate enhanced LSC and reduced normal HSC support (Related to Figure 4)**

(A) Selected gene sets identified as significantly upregulated or downregulated in CML 6C3+ and THY+ cells compared to normal 6C3+ and THY+ cells (4 biological replicates) on GSEA analysis are shown with normalized enrichment score (NES), and statistical significance indicated by false discovery rate (FDR) and p-value. (B) Representative plots for significantly upregulated gene sets related to cell adhesion and extracellular matrix (ECM) in CML compared to normal 6C3+ cells. (C) Representative plots for significantly upregulated gene sets related to cell cycling in CML compared to normal THY+ cells. Relative mRNA levels from qPCR assay (n=4, each performed in duplicates) for osteogenesis-related genes in normal and CML THY+ cells (D), and for adipogenesis-related genes in normal and 6C3+ cells (E). Error bars represent mean  $\pm$  sem. Significance values. ns (non-significant)  $P > 0.05$ , \* $P < 0.05$ , \*\* $P < 0.01$ , \*\*\* $P < 0.001$ , \*\*\*\* $P < 0.0001$ .

**A**

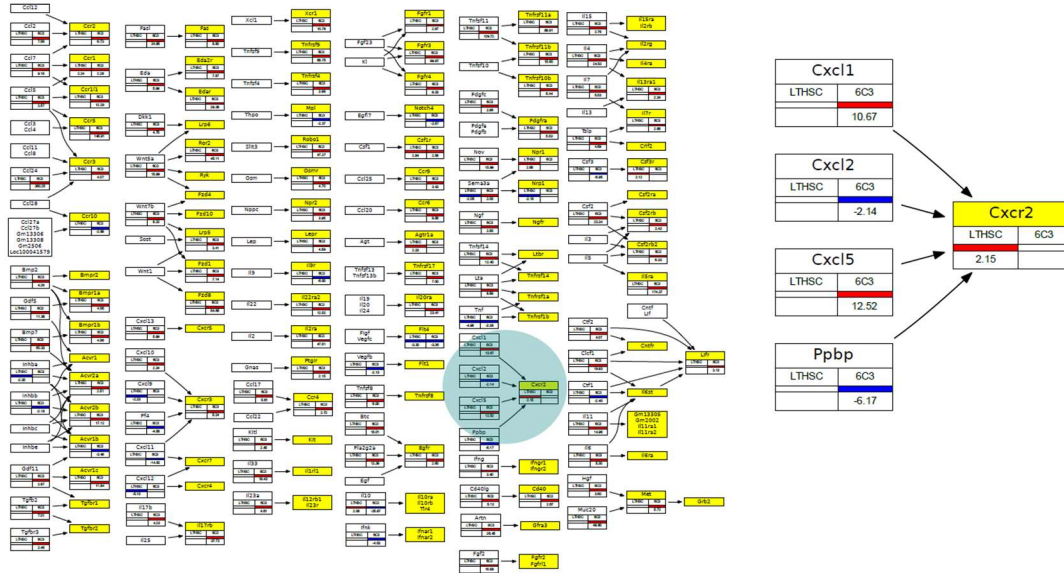

**B**

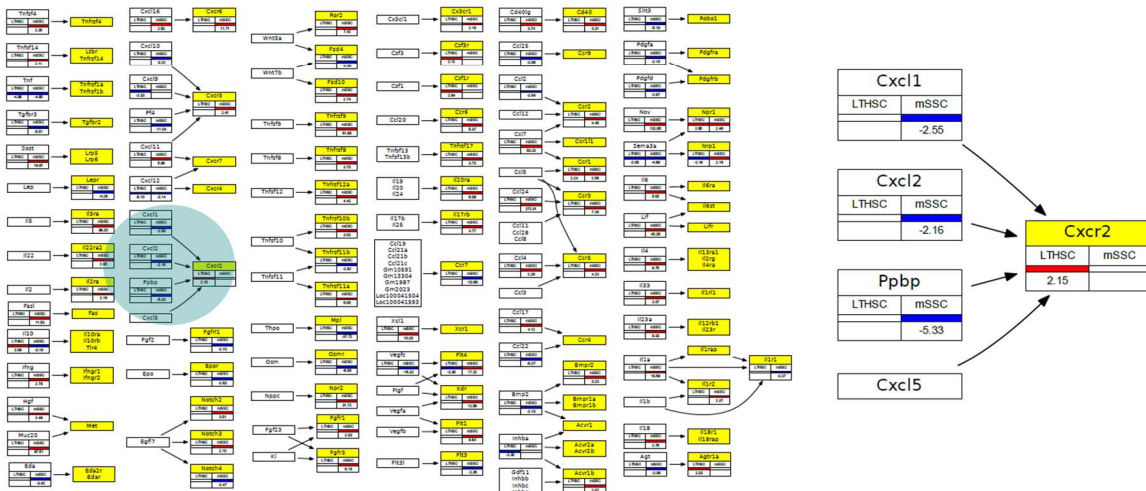

**C**

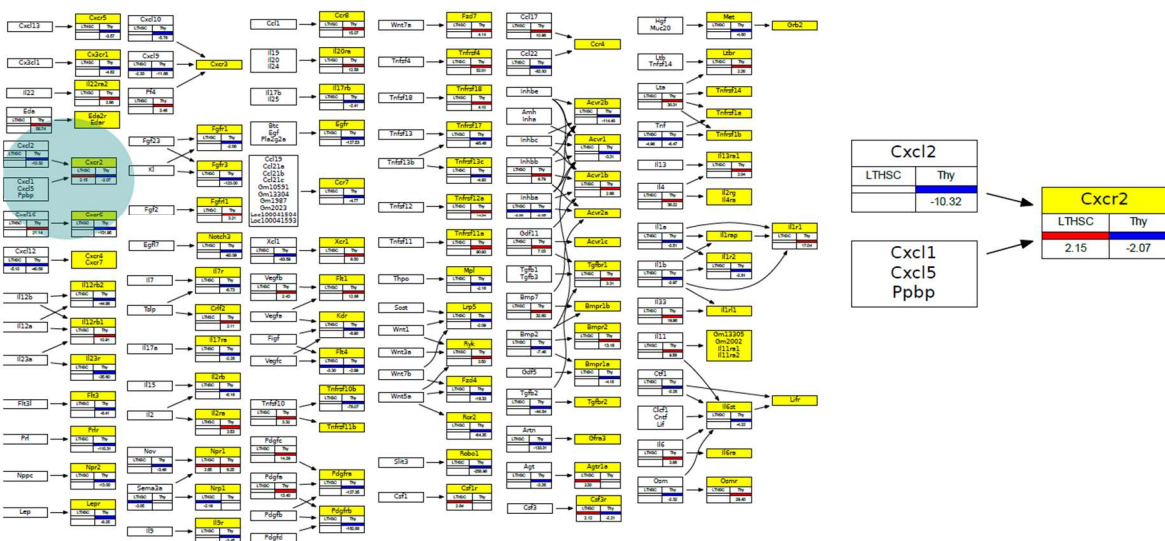

**Figure S4. Altered gene expression in CML compared to normal mesenchymal stem and progenitor cell subsets (Related to Figure 4)**

Ligand-receptor interaction interface maps between CML 6C3+ and CML LSCs (A), CML mSSC and CML LSCs (B), and CML THY+ and CML LSCs (C) are shown. Ligand (white boxes)-receptor (yellow boxes) pairs are shown if at least one gene in a given ligand-receptor pair was differentially expressed (fold change > ~2x and FDR < 0.05). Numbers in each box represent fold change, with up- (red) or down-regulated (blue) fold changes. The paracrine CXCL1/CXCL5-CXCR2 interactions between CML subsets and CML LSCs are highlighted with blue circles and represented on the right side. See also Table S1.

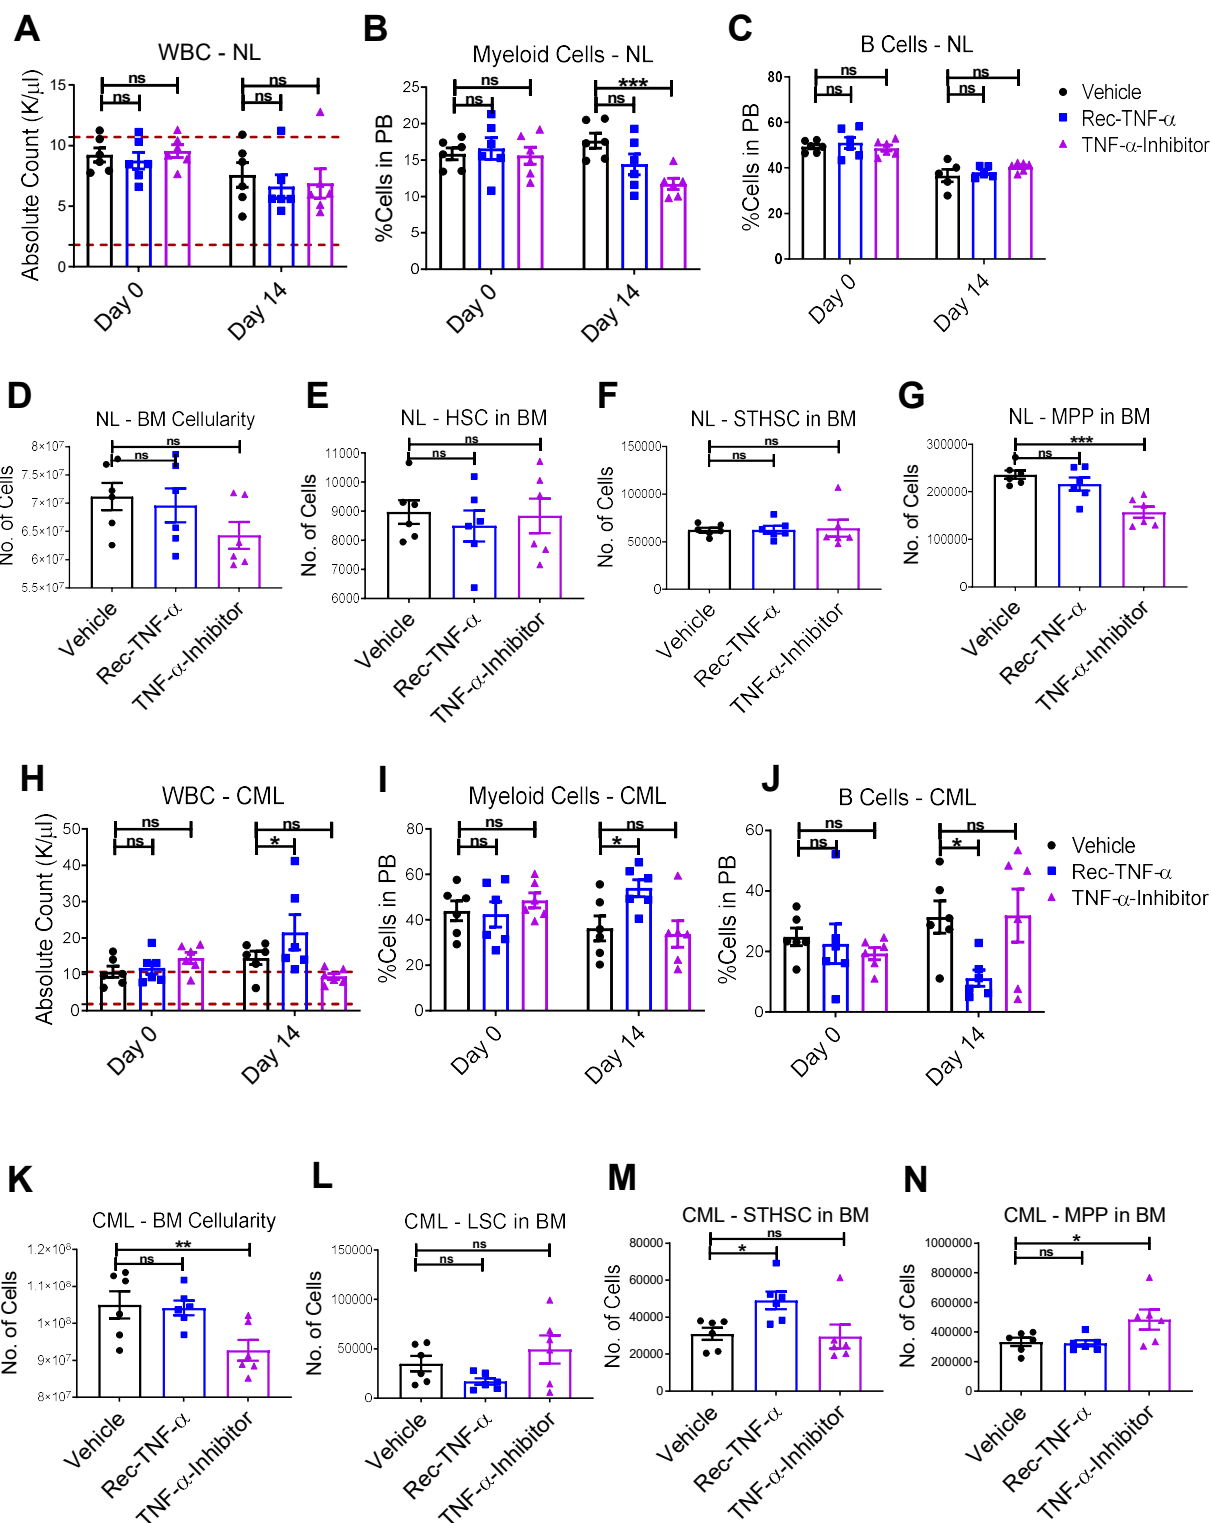

**Figure S5. TNF $\alpha$  signaling contributes to expansion and altered gene expression in 6C3+ stromal progenitors in CML bone marrow (Related to Figure 5)**

Total WBC (A), myeloid cell (CD45+Gr-1+CD11b+) frequency (B), and B cell (CD45+CD19+B220+) frequency (C) in PB of normal mice at start of treatment (Day 0) and end of recombinant TNF- $\alpha$  and anti-TNF- $\alpha$  treatment (Day 14). Total BM cellularity (D), LSCs (E), STHSC (F), and MPP (G), in the BM (2 femurs+2 tibiae) of normal mice. Total WBC numbers (H), and myeloid cell (CD45+Gr-1+CD11b+) (I) and B cell (CD45+CD19+B220+) frequency (J), at start of treatment (Day 0) and end of treatment (Day 14) in PB of CML mice. Total number of cells (K), LSCs (L), STHSC (M), and MPP (N) numbers in the BM (2 femurs+2 tibiae) of CML mice (n= 5-6 mice/group). Error bars represent mean  $\pm$  sem. Significance values. ns (non-significant)  $P>0.05$ , \* $P<0.05$ , \*\* $P<0.01$ , \*\*\* $P<0.001$ , \*\*\*\* $P<0.0001$ .

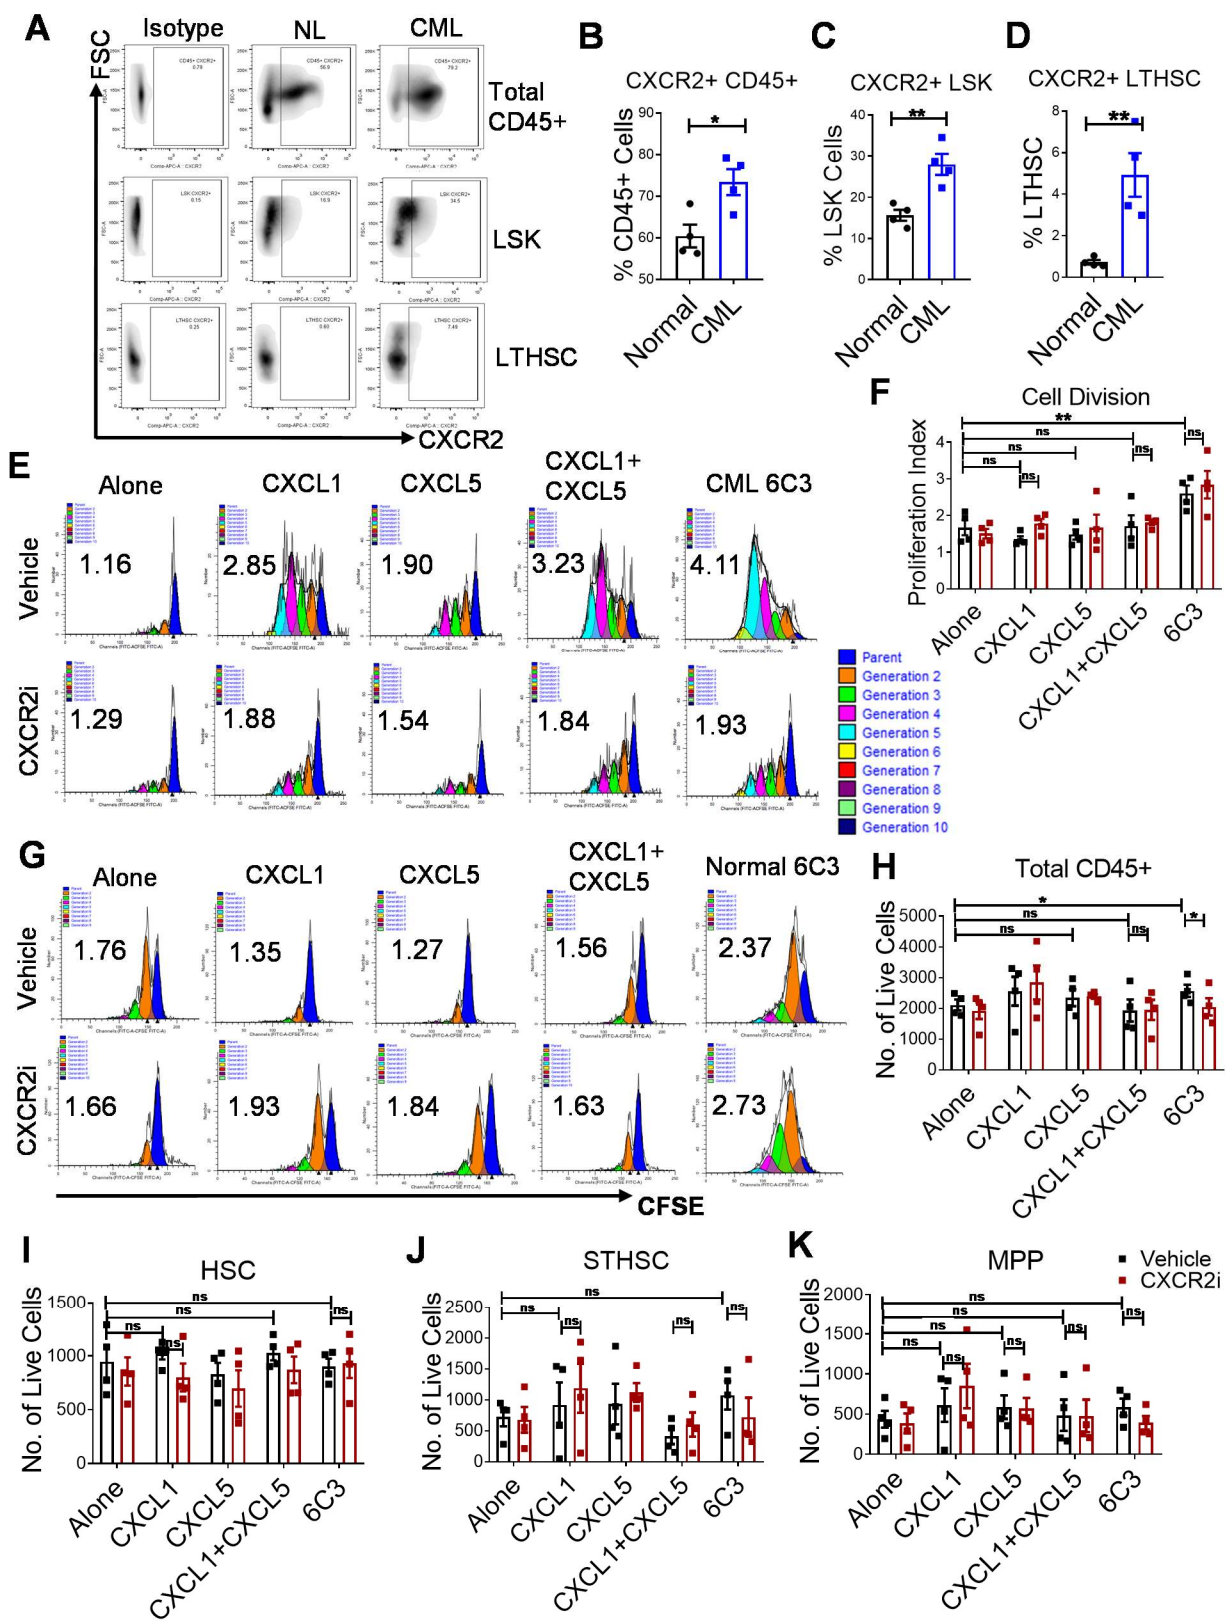

**Figure S6. CXCL1 and CXCL5 signaling through CXCR2 enhances growth of leukemic stem and progenitor cells (Related to Figure 6)**

(A) Representative flow plots showing CXCR2 expression in freshly isolated BM populations from normal and CML mice using anti-CXCR2 antibody and isotype control antibody. Relative frequency of CXCR2<sup>+</sup> cells as a percentage of parent population among total hematopoietic cells (CD45<sup>+</sup>) (B), hematopoietic stem/progenitor cells (LSK) (C) and primitive LSCs (D) (n=4 independent samples/group). (E) Representative CFSE plots of a CML sample. FACS purified CFSE<sub>max</sub> normal HSCs were cultured in the presence or absence of normal 6C3<sup>+</sup> cells, CXCL1 (250ng/ml), CXCL5 (250ng/ml), CXCL1 and CXCL5, or vehicle, with or without CXCR2i (10μM) for 72hrs (2000 cells/condition), and proliferation and cell numbers analyzed. A proliferation index was calculated on the basis of reduction in CFSE levels. The calculated proliferation index for each plot is indicated. (F) Proliferation index of normal cells exposed to different treatments (n=4 samples/group). (G) Representative CFSE plots of normal sample. The absolute number of normal total CD45<sup>+</sup> cells (H), HSCs (I), STHSC (J) and MPP (K). Error bars represent mean ± sem. ns (non-significant) P>0.05, \*P< 0.05, \*\*P< 0.01, \*\*\*P<0.001, \*\*\*\*P<0.0001.

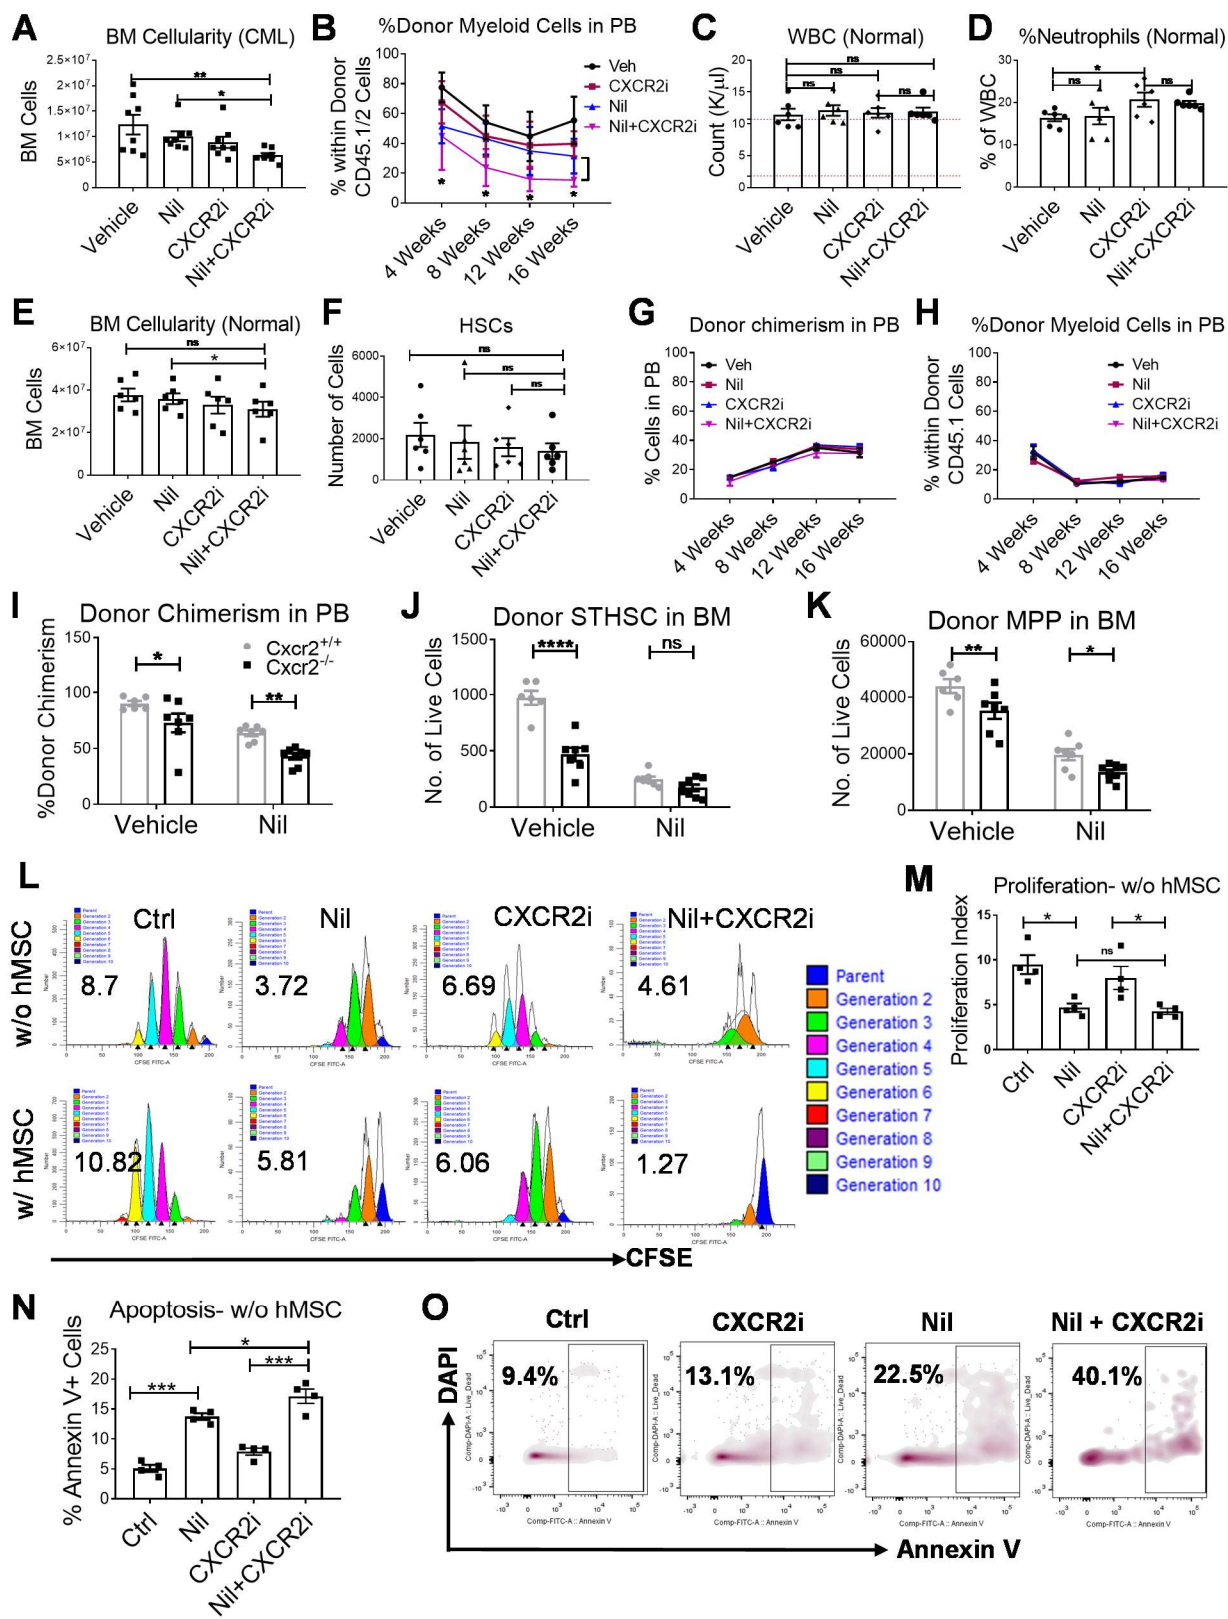

**Figure S7. CXCR2 targeting reduces leukemic stem cell growth and survival that is further enhanced in combination with TKI treatment (Related to Figure 7)**

(A) Overall BM cellularity of CML mice from the experiment shown in Figure 7A (n= 6-8 mice/group). (B) Frequency of donor CML myeloid cells from serial blood draw performed every 4 weeks until 16 weeks from the experiment shown in Figure 7F. Total WBC (C) and frequency of neutrophils (D) in the PB, and total number of BM cells (E) and HSCs (F) in the BM of normal mice. After primary transplantation of normal WBM cells from the experiment shown in Figure 7A, LSCs were FACS purified and transplanted into secondary healthy WT mice irradiated at 800cGy. Serial blood draw was performed every 4 weeks until 16 weeks. Total donor chimerism (G), and donor myeloid cells (H) in the PB. Frequency of donor chimerism in the PB (I), and numbers of donor STHSC (J) and MPP (K) in the BM (2 femurs+2 tibiae) of CML mice. (L) Representative CFSE plots for a CML sample from the experiment shown in Figure 7L. A proliferation index was calculated on the basis of reduction in CFSE levels. The calculated proliferation index for each plot is indicated. Effects of treatment on the proliferation index in the absence of hMSC cells (M), and the percentage of apoptosis calculated based on Annexin V+ labeling of CML cells in the absence of hMSC (N) and representative FACS plots (O) (n=4 biological samples/group). Error bars represent mean  $\pm$  sem. ns (non-significant)  $P>0.05$ , \* $P<0.05$ , \*\* $P<0.01$ , \*\*\* $P<0.001$ , \*\*\*\* $P<0.0001$ .

**Table S2. A list of qPCR assays used (Related to Figures 5 and S3).**

| Target  | Source                   | Cat No.                |
|---------|--------------------------|------------------------|
| mActb   | Thermo Fisher Scientific | 4352933E               |
| mBmp1   | Thermo Fisher Scientific | Mm <u>00802220</u> _m1 |
| mBmp7   | Thermo Fisher Scientific | Mm <u>00432102</u> _m1 |
| mBmpr2  | Thermo Fisher Scientific | Mm <u>00432134</u> _m1 |
| mAlpl   | Thermo Fisher Scientific | Mm <u>00475834</u> _m1 |
| mPostn  | Thermo Fisher Scientific | Mm <u>01284919</u> _m1 |
| mDkk1   | Thermo Fisher Scientific | Mm <u>00438422</u> _m1 |
| mAdipoq | Thermo Fisher Scientific | Mm <u>00456425</u> _m1 |
| mPaqr5  | Thermo Fisher Scientific | Mm <u>01170057</u> _m1 |
| mPaqr7  | Thermo Fisher Scientific | Mm <u>00510958</u> _m1 |
| mPaqr8  | Thermo Fisher Scientific | Mm <u>00546979</u> _m1 |
| mCfd    | Thermo Fisher Scientific | Mm <u>01143935</u> _g1 |
| mZfp423 | Thermo Fisher Scientific | Mm <u>00677660</u> _m1 |
| mCxcl1  | Thermo Fisher Scientific | Mm <u>04207460</u> _m1 |
| mCxcl5  | Thermo Fisher Scientific | Mm <u>00436451</u> _g1 |
| mCxcr2  | Thermo Fisher Scientific | Mm <u>99999117</u> _s1 |
